# Supplementary material for: Unraveling the Mechanism of Cork Spot-like Physiological Disorders in ‘Kurenainoyume’ Apples Based on Occurrence Location
Source: MDPI journal article supplement (doi:10.3390/plants13030381), 2024-01-27
Supplement: s1 [file s1]

Supplementary material

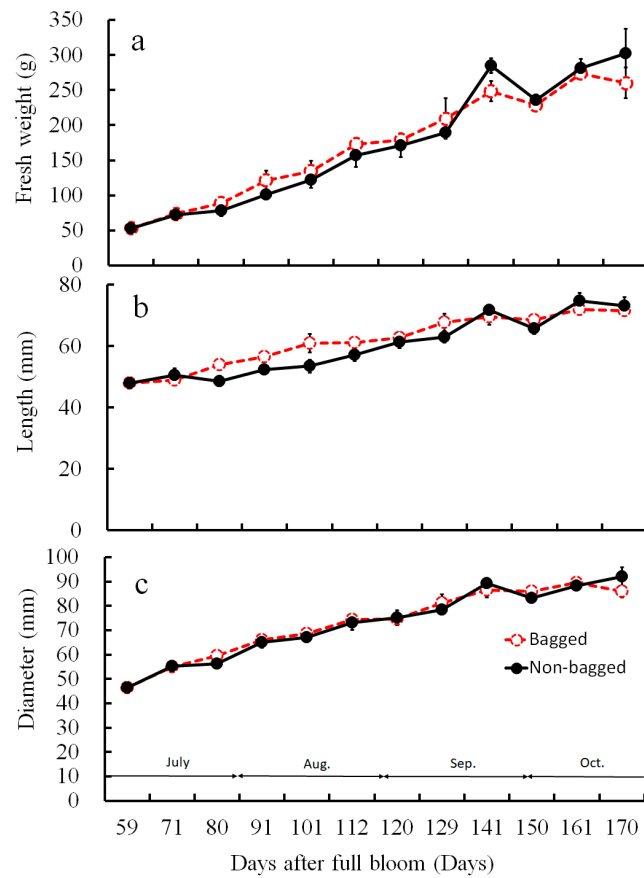

**Figure S1.** Changes in (a) fruit fresh weight; (b) fruit length, and (c) fruit diameter during fruit development of both paper-bagged and non-bagged 'Kurenainoyume' apples in 2018

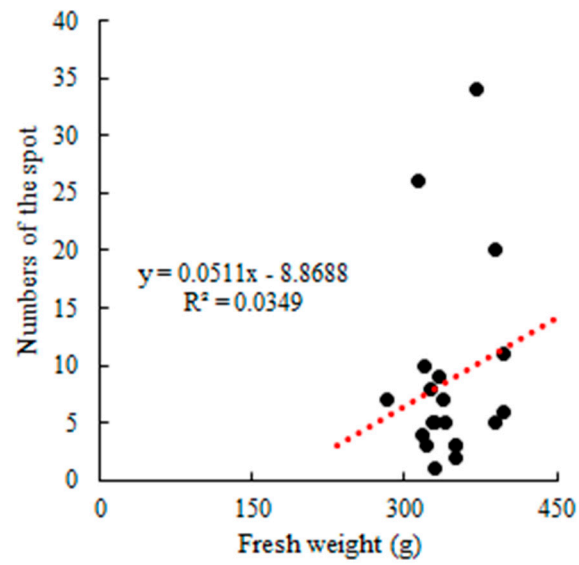

**Figure S2.** Relationship between the number of spots and fruit fresh weight of non-bagged 'Kurenainoyume' apples at harvest (October 23, 2019, 166 DAFB) (n = 20)
